1 **Management performance mapping and the value of information**  
2 **for regional prioritization of management interventions**

3  
4  
5 C. E. Buddenhagen<sup>1234</sup>, J. Andrade Piedra<sup>5</sup>, G. A. Forbes<sup>5</sup>, P. Kromann<sup>56</sup>, I. Navarrete<sup>5</sup>, S.  
6 Thomas-Sharma<sup>7</sup>, Y. Xing<sup>123</sup>, R. A. Choudhury<sup>1238</sup>, K. F. Andersen<sup>1239</sup>, E. Schulte-  
7 Geldermann<sup>5,10</sup>, K. A. Garrett<sup>123</sup>

8  
9 <sup>1</sup>Plant Pathology Department, University of Florida, Gainesville, FL, USA

10  
11 <sup>2</sup>Institute for Sustainable Food Systems, University of Florida, Gainesville, FL, USA

12  
13 <sup>3</sup>Emerging Pathogens Institute, University of Florida, Gainesville, FL, USA

14  
15 <sup>4</sup>AgResearch, Ltd., Ruakura, Hamilton, New Zealand

16  
17 <sup>5</sup>International Potato Center, Lima, Peru, Quito, Ecuador, and Nairobi, Kenya

18  
19 <sup>6</sup>Field Crops, Wageningen University & Research, Lelystad, The Netherlands

20  
21 <sup>7</sup>Department of Plant Pathology and Crop Physiology, Louisiana State University Agricultural  
22 Center, Baton Rouge, LA, USA

23  
24 <sup>8</sup>School of Earth, Environment, Marine Science, University of Texas Rio Grande Valley, TX,  
25 USA

26  
27 <sup>9</sup>Department of Plant Pathology, Kansas State University, Manhattan, KS, USA

28  
29 <sup>10</sup>Department of Agriculture, University of Applied Sciences Bingen, Bingen, Germany

30  
31 Corresponding author: [karengarrett@ufl.edu](mailto:karengarrett@ufl.edu)

33 **ABSTRACT**

34 Policymakers and donors often need to identify the locations and settings where technologies are  
35 most likely to have important effects, to increase the benefits from agricultural development or  
36 extension efforts. Higher quality information may help to target the high-payoff locations. The  
37 value of information (VOI) in this context is formalized by evaluating the results of decision  
38 making guided by a set of information compared to the results of acting without taking the  
39 information into account. We present a framework for management performance mapping that  
40 includes evaluating the VOI for decision making about geographic priorities in regional  
41 intervention strategies, in case studies of Andean and Kenyan potato seed systems. We illustrate  
42 use of Bayesian network models and recursive partitioning to characterize the relationship  
43 between seed health and yield responses and environmental and management predictors used in  
44 studies of seed degeneration. These analyses address the expected performance of an  
45 intervention based on geographic predictor variables. In the Andean example, positive selection  
46 of seed from asymptomatic plants was more effective at high altitudes in Ecuador. In the Kenyan  
47 example, there was the potential to target locations with higher technology adoption rates and  
48 with higher potato cropland connectivity, i.e., a likely more important role in regional epidemics.  
49 Targeting training to high performance areas would often provide more benefits than would  
50 random selection of target areas. We illustrate how assessing the VOI can help inform targeted  
51 development programs and support a culture of continuous improvement for interventions.

52

53 ***Additional keywords:*** agricultural development, disease, Ecuador, GIS, intervention ecology,  
54 Kenya, pest management, potato, seed degeneration, translational science, value of information,  
55 virus, yield gap

56 A central problem in applied spatial ecology is how to partition management efforts across  
57 landscapes. Interventions by governments or development organizations are often designed to  
58 increase regional crop yield, for example by improving disease management. International,  
59 governmental, and non-governmental organizations that seek to reduce poverty, enhance food  
60 security, and support ecosystem services, need strategies to geographically target interventions  
61 after identifying priorities using participatory approaches with stakeholders. We propose  
62 “management performance mapping” as a tool for translating experimental results to support  
63 identification of geographic priorities by policy makers and donors. Management performance  
64 mapping consists of scaling up models based on an often limited number of observations, to  
65 visualize how specific interventions are likely to perform at a regional scale (Altieri and Nicholls  
66 2008; van Bussel et al. 2015; van Wart, Kersebaum, et al. 2013; Grassini et al. 2015).  
67 Management performance mapping can have a number of applications, such as providing a  
68 summary of recommendations for extension programs, or evaluating which type of management  
69 is most effective for a set of locations. In this paper, we focus on management performance  
70 mapping to inform targeting of interventions to support a management component known to be  
71 effective under some circumstances, where the goal is to identify the locations where it will be  
72 most effective. This approach may be particularly useful in low-income countries where  
73 smallholder farmers have fewer options, and there is interest in making a valuable new option  
74 available through a system intervention. Management performance mapping can be implemented  
75 to visualize the impact of proposed interventions, to improve decision-making and policymaking,  
76 as a component of adaptive management in development (Fig. 1).

77 Digital or precision agriculture and species distribution models both address components  
78 of spatial prioritization and are thus related to management performance mapping. The question

79 of how to optimize information use for decision making is addressed at the within-field scale in  
80 precision agriculture (Tittonell and Giller 2013), allowing well-resourced farmers, and  
81 potentially smallholder farmers (Cook et al. 2003), to collect and utilize spatially explicit data  
82 sets (in near real-time) about crop performance. Inputs such as fertilizer, pesticides, and  
83 irrigation are applied to areas of the field where they are most needed to maximize yields.

84 Species distribution models address the problem of optimal targeting indirectly, by  
85 providing information about where invasive (or endangered) species, including pathogens, are  
86 most likely to be found (Austin 2007; Hijmans and Graham 2006; Sheppard et al. 2014), often  
87 grappling with problems in statistical inference (Stolar and Nielsen 2015) also relevant to  
88 management performance mapping. Species distribution models are generally designed to draw  
89 inference beyond the regions where data were collected, by estimating species niche parameters  
90 based on maps of species occurrence or abundance throughout a species' native and introduced  
91 range (Sutherst and Maywald 1985; Wang et al. 2017; Phillips et al. 2018; Bourdôt and  
92 Lamoureaux 2019). Management performance mapping for disease management can  
93 incorporate both information about which environments are conducive to pathogen and vector  
94 reproduction, and which environments are conducive to effective management.

95 The value of information (VOI) concept is useful for evaluating the benefits of basing  
96 strategies on management performance mapping. Assessing the VOI involves quantifying the  
97 expected benefit of reducing uncertainty (Canessa et al. 2015), as described further below. VOI  
98 analyses offer a means of both evaluating information and benefits, and assessing the role of  
99 uncertainty when comparing management options (Hirshleifer and Riley 1979; Macauley 2006;  
100 Canessa et al. 2015). VOI analyses compare outcomes from decision making with and without  
101 particular units of information, taking into account the stakes for making good or bad decisions,

102 such as differences in yield or profit (Fig. 2). In studies of willingness-to-pay, such as farmer  
103 willingness-to-pay for technologies, the utility functions for technologies are closely related to  
104 the VOI (Breidert et al. 2006; Asante Bright Owusu et al. 2011; Hanemann 1991). Of course,  
105 decision-maker willingness-to-act based on information is necessary for information valuation to  
106 be meaningful. For example, overly confident decision-makers may not be influenced by new  
107 information, or they may not reflect on the uncertainty that is inherent in the information  
108 available. Many examples in the VOI literature focus on agriculture, such as the uncertainty risk  
109 distribution for farm yield (Hirshleifer and Riley 1979), the value of weather forecasting for  
110 farmers (Lave 1963), and risk assessment for crop futures (Danthine 1978). A related area of  
111 application of VOI concepts is in invasion biology more generally and in conservation biology,  
112 where decisions must also be made about where to prioritize efforts (Canessa et al. 2015;  
113 Johnson et al. 2017; Wilson 2015). VOI analyses have so far seen little application in plant  
114 pathology, crop epidemiology, or seed system development, where they have the potential to  
115 improve research prioritization and decision making.

116 We present case studies of management performance mapping and the application of VOI  
117 analysis that focus on smallholder management of “seed degeneration” in agricultural systems.  
118 Seed degeneration is the reduction in yield or quality caused by an accumulation of pathogens  
119 (often viruses) and pests in planting material over successive cycles of propagation, where  
120 vegetatively-propagated crops deserve particular attention because of their higher risk of disease  
121 transmission (Thomas-Sharma et al. 2016). Establishing improved seed systems is challenging,  
122 especially in low-income countries, due in part to the many system components that must be  
123 integrated for seed system success (Jaffee and Srivastava 1994; McGuire and Sperling 2016;  
124 McQuaid et al. 2016; Sperling 2008; Gildemacher et al. 2009; Bentley and Vasques 1998;

125 Almekinders et al. 2019). In informal seed systems in low-income countries, farmers typically  
126 use seed saved from the previous season for replanting, often leading to reduced yields, e.g., 5-  
127 50% reduction (Devaux et al. 2010a), especially when farmers are unfamiliar with approaches  
128 for selecting healthier seed from their fields with reduced pathogen risk. Despite the challenges  
129 (Almekinders et al. 2019), seed system improvement has great potential for improving regional  
130 agriculture, by providing healthier seed of better varieties, and has been a major focus of  
131 agricultural development efforts funded by many agencies (e.g., national plant protection  
132 agencies, The Bill and Melinda Gates Foundation, USAID, and FAO) (Jaffee and Srivastava  
133 1994; McGuire and Sperling 2016; Almekinders et al. 1994).

134         Optimizing yield by reducing disease impacts, and improving seed quality, is a primary  
135 goal of many seed system interventions. Governments and institutions with a strong focus on  
136 science for development, such as CGIAR, work on a suite of factors linked to seed system  
137 health. Farmer training efforts focus on options for disease management and optimal decision-  
138 making. International development efforts for improved seed systems seek to increase farmer  
139 access to disease-free, disease-resistant, high-quality seed, to improve farmer practices, to  
140 implement “integrated seed health strategies” (Thomas-Sharma et al. 2016), and to implement  
141 realistic phytosanitary thresholds (Choudhury et al. 2017). Despite concerted efforts, many  
142 systems may revert to largely informal systems (sub-optimal seed sourced on-farm much of the  
143 time) after interventions. For example, 98% of potato seed sources in the Andes were reported as  
144 informal (Louwaars et al. 2013; Devaux et al. 2010a). Interventions are more likely to succeed if  
145 they are affordable, and help farmers to be profitable (McGuire and Sperling 2013; Sperling et  
146 al. 2013). As an example, positive selection is an on-farm management intervention that can  
147 provide large yield benefits, e.g., 28-55% increases (mean 32%) (Gildemacher et al. 2012, 2011;

148 Schulte-Geldermann et al. 2012) and is often recommended as part of an integrated seed health  
149 strategy (Thomas-Sharma et al 2016). Under positive selection, farmers select healthy appearing  
150 plants and mark them for later harvesting of seed. Training farmers in the techniques of positive  
151 selection can be an effective component of an integrated seed health strategy, and we use  
152 positive selection as the example management in our case studies.

153         A challenge for management performance mapping – as for species distribution  
154 modelling, digital agriculture, and most analyses designed to draw inference about larger  
155 geographic areas – is to make the most of the available data while avoiding overinterpretation of  
156 results. Often data about agricultural management performance exist, or can be collected inside  
157 of existing intervention projects, but the data are collected at the scale of fields, farms or  
158 individual plant performance measures. Multiple factors influence plant productivity apart from  
159 management, generating uncertainty about the pay-off from management choices even where  
160 data are relatively abundant. We discuss considerations for use of limited data. The Andean  
161 case study addressed below illustrates both the challenge and potential value of management  
162 performance mapping. Greater vector activity is often assumed in lower elevations, suggesting  
163 that virus management in seed materials would be more important in these regions. Field  
164 observations in Ecuador, though based on a limited number of fields, suggest that the reverse is  
165 true for this case. We evaluate the VOI from management performance mapping to guide  
166 selection of intervention locations if this counterintuitive observation is indeed representative for  
167 the region.

168         Our objectives in this study are to (i) introduce and illustrate the concept of management  
169 performance mapping and associated methods, (ii) introduce the use of VOI analysis in this  
170 context, and (iii) illustrate the application of management performance mapping for potato seed

171 degeneration management by positive selection of seed in the Andes and in Kenya. We also  
172 illustrate how analysis of likely management performance at individual sites can be combined  
173 with other geographic considerations, such as cropland connectivity as a proxy for the role of  
174 locations in epidemic spread for the region (Xing et al. 2020).

175

## 176 **METHODS**

177 We describe the steps involved in producing management performance maps (Fig. 1),  
178 using the example of training farmers in positive selection to identify plants more likely to  
179 produce healthy seed. Then we illustrate management performance mapping for a seed  
180 degeneration data set from a potato seed study in Ecuador and a study of management adoption  
181 in Kenya (Gildemacher et al. 2012; Kromann et al. 2017). As a step in preparing the Andean  
182 management performance maps, we illustrate the application of Bayesian networks and recursive  
183 partitioning for assessing the influence of disease, environmental factors, and management on  
184 yield. We also evaluate the potential VOI for guiding the selection of locations in development  
185 interventions for potato seed health in Ecuador and Kenya based on the estimated effects,  
186 although we note that in these cases more data would be needed before proceeding to action in  
187 the field based on these analyses. We illustrate steps 1 through 5 of the management  
188 performance mapping pipeline (Fig. 1), while steps 6 through 8 would also be key to achieving  
189 outcomes in the field in an adaptive management approach (Shea et al. 2014). To illustrate the  
190 potential for combining management performance mapping (evaluated for each geographic pixel  
191 independently) with other types of spatial processes that may include the potential roles of  
192 locations in epidemic spread, we also provide an example of integration with a cropland  
193 connectivity analysis (Xing et al. 2020), described below.



194           **1) Formulate questions about the performance of a specific management strategy**  
195 **across a geographic region.** In these case studies, we evaluate the effects of positive selection  
196 of farm-saved seed potato for virus disease management. In general, the identification of  
197 management strategies for evaluation will likely be more successful if the process includes  
198 participatory input from stakeholders. In the Andean case study, our questions are: Where would  
199 training in positive selection likely produce the greatest benefit for yield in Ecuador and  
200 Colombia? And how does the variety grown and the time since seed replacement influence the  
201 benefit for yield? In the Kenyan case study, our question is: Where would training in positive  
202 selection likely produce the greatest benefit for yield, choosing among three regions of Kenya?

203           **2) Assemble data related to the performance of the management strategy.** We use  
204 two data sets as case studies. The first is from potato production in the Ecuadorian Andes, from a  
205 study designed for parameter estimation for a seed degeneration model. This study (Kromann et  
206 al. 2017) monitored seed degeneration in two potato cultivars, at three altitudes, and considered  
207 the use of on-farm seed management options. The two cultivars were INIAP-Fripapa and  
208 Superchola (perceived by farmers to be susceptible and resistant to degeneration, respectively).  
209 The field trials were carried out during three cycles of planting at three sites representing three  
210 altitudes (<2700 masl, 3000 masl and > 3400 masl, where the site <2700 masl was moved during  
211 the course of the experiment). Twelve 49 m<sup>2</sup> plots were planted each year, two plots of each  
212 cultivar at each altitude/site. In each whole plot, three types of seed management were carried  
213 out in subplots: positive selection, roguing and random selection. The response variables  
214 included (1) virus incidence (Potato virus X (PVX), Potato virus Y (PVY), Potato virus S (PVS),  
215 Potato leaf roll virus (PLRV), Andean potato latent virus (APLV), and Andean potato mottle

216 virus (APMoV)) in plants at emergence, flowering and in tubers, evaluated using DAS-ELISA,  
217 (2) incidence and severity of pest damage and diseases in tubers, and (3) tuber yield.

218 This Ecuadorian study was designed for parameter estimation for a seed degeneration  
219 model (Thomas-Sharma et al. 2017). The main components of this model relate to seed health  
220 (virus incidence, time/seasons since certified seed was last obtained), cultivar, environmental  
221 factors (weather), management (seed propagation and selection) and yield data for samples of  
222 individual potato plants (Kromann et al. 2017). A single site represented each altitude in this  
223 data set, so variability within a scenario can only be evaluated at the individual plant level. Lack  
224 of replication at the field level is a limitation for management performance mapping, because an  
225 analysis intended for providing recommendations for project implementation would be stronger  
226 if multiple farms per altitude provided estimates of farm-to-farm variation in management  
227 performance within an altitude range. We focus on yield data as the response in the management  
228 performance mapping example, with potential predictors being farm altitude (across three  
229 altitudes), seasons since certified seed was obtained, and the management performance of  
230 positive selection compared to roguing or random seed selection as management strategies.  
231 Climate variables – precipitation, humidity and temperature, from the WorldClim data base (Fick  
232 and Hijmans 2017) – were also evaluated as potential predictors, but were not effective  
233 predictors of either disease incidence or yield, probably at least in part because only three fields  
234 per year were evaluated (data and analysis not shown).

235 The second data set was published data about seed health management, and positive  
236 selection training and adoption rates in three counties in Kenya (Gildemacher et al. 2012). We  
237 used this data to illustrate integrating information about the likelihood that farmers in a region

238 will adopt a technology (Gildemacher et al. 2012), another key component of intervention  
239 success.

240 **3) Identify predictor variables for management performance.** There are many  
241 potential predictor variables for performance indicators (Thomas-Sharma et al., in preparation)  
242 and a wide range of methods can be used to identify important predictors, including regression  
243 analysis, generalized linear models, and generalized additive models. We illustrate two types of  
244 machine learning algorithms – classification and regression trees, and Bayesian network analysis  
245 – to evaluate potential predictors, focusing on yield as the response used as a management  
246 performance indicator. These two methods were used to identify predictor variables for the  
247 effect of positive selection on yield for the Kromann et al. (2017) dataset. Simpler approaches to  
248 identifying key predictors may also often prove useful in application of management  
249 performance mapping.

250 ***Classification and regression trees.*** Classification and regression trees have been applied  
251 in agricultural systems for land and soil classification, climate change impact assessment, risk  
252 assessment, and evaluation of toxin levels and disease conduciveness in plants (Langemeier et al.  
253 2016; Novak and LaDue 1999; Etter et al. 2006; Caley and Kuhnert 2006; Paul and Munkvold  
254 2004; Tittonell and Giller 2013). The strength of the recursive partitioning method lies in its  
255 ability to deal with non-linearity in data and to depict and support interpretation of the outputs in  
256 a decision-tree format. A limitation of this method is that it may perform relatively poorly with  
257 continuous variables or large numbers of unordered variables. We illustrate use of the rpart  
258 package in R in the following two examples using the Kromann et al (2017) data set.

259 ***Effect of seed selection, time since seed renewal, and altitude on yield, evaluated with***  
260 ***recursive partitioning (Andes).*** We evaluated yield as the response variable, with predictors

261 being the use of positive selection (as opposed to roguing or random seed selection), the time  
262 since seed renewal through purchase of certified seed (either three seasons or less than three  
263 seasons), and the effect of altitude (across three altitudes). Because altitude is available as a  
264 potential geographic predictor variable for the region, it is a candidate for extrapolating analysis  
265 of the performance of positive selection to a wider area in Step 4 (Fig. 1).

266 ***Effect of potato cultivar and its interactions on yield, evaluated with recursive***  
267 ***partitioning (Andes)***. In a previous study of a grower cooperative in Tungurahua, Ecuador,  
268 Superchola (one of the most important potato varieties in Ecuador) and INIAP-Fripapa were sold  
269 and grown at a ratio of approximately 2:1 by volume (Buddenhagen et al. 2017). Our analysis of  
270 the Kromann et al. dataset (2017) also focuses on these two varieties. We evaluate the effects of  
271 cultivar, altitude, and management by estimating mean per-plant yields across treatment  
272 combinations, and by using recursive partitioning in rpart.

273 ***Bayesian networks***. Bayesian networks (Therneau et al. 2010) have been applied in  
274 natural resource management systems for applications such as vegetation classification, optimal  
275 decision making, disease management, adaptive management of wildlife habitat, and expert  
276 elicitation (Geenen and Van Der Gaag 2005; Aguilera et al. 2011; Kristensen and Rasmussen  
277 2002; Perez-Ariza et al. 2012; Howes et al. 2010). A Bayesian network is a directed, acyclic  
278 graph whose nodes represent predictor variables and links represent dependencies. The  
279 relationships between variables are quantified in conditional probability tables, where the set of  
280 all tables together represents the full joint distribution. Important strengths of the Bayesian  
281 network method include its ability to infer probabilistic relationships among many variables  
282 simultaneously. The network structure can be set manually by the user or learned from the data  
283 using a variety of algorithms. In the case of exact estimation algorithms, it is possible to set

284 values for any combination of nodes and produce new posterior probabilities for each variable in  
285 the network. A limitation of this method is the cost of some of the most advanced Bayesian  
286 network software. In addition, combinations of continuous and categorical data can be  
287 problematic for some commonly-used Bayesian network algorithms (Aguilera et al. 2011). Tools  
288 available for Bayesian network analysis include BI-CAMML, Hugin and Netica (Aguilera et al.  
289 2011). R packages include bnlearn, gRain and pcalg (Nagarajan et al. 2013). We selected Netica  
290 for this illustration because it is relatively affordable, the algorithms it uses allow for immediate  
291 updating of conditional probabilities based on selected levels for variables, it has a powerful  
292 graphical interface, and it is widely used in ecological and environmental analyses (Aguilera et  
293 al. 2011).

294 *Effect of positive selection on yield, evaluated in Bayesian networks (Andes).* The  
295 benefit of positive selection (in the third cropping cycle after certified seed purchase) was  
296 evaluated in a Bayesian network in Netica. Netica's Tree-Augmented Naive Bayes (TAN)  
297 classifier algorithm was used to estimate the conditional probability tables and the network  
298 structure. From the conditional probability tables we estimated yields above (7.7 t/ha) and below  
299 (3.2 t/ha) the threshold altitude identified in the analysis: 2895 m.a.s.l.

300 *A simple analysis of regional differences in adoption of training recommendations*  
301 *(Kenya).* In this case study, we evaluated regional differences in farmers' adoption of positive  
302 selection after training (Table 1), reported by Gildemacher et al. (2012) as follows for three  
303 Kenyan counties: Nakuru 46%, Nyandarua 19%, and Narok 18%.

304 **4) Estimate management performance across the geographic study region.** For  
305 positive selection of on-farm seed in the Andes, we selected for analysis and extrapolation a  
306 major potato growing region stretching from southern Ecuador to southern Colombia. Using

307 potato production geographic data layers from SPAM 2005 v3.2 Global Data (IFPRI and IIASA  
308 2016) we focused on pixels with >200 ha potato production per pixel (where a pixel represents 5-  
309 arc minutes, approximately 10,000 ha). Here 51% of potato production is above 2895 m (the  
310 altitude threshold identified in the analyses above) based on SPAM estimates (You et al. 2012).  
311 The resulting management performance map will indicate that these regions would be priorities  
312 for targeting training in positive selection if decisions are based solely on this analysis of the data  
313 from Kromann et al. (2017).

314 For positive selection of on-farm seed in Kenya, rather than extrapolating the estimates of  
315 management performance for positive selection, we simply compare the relative performance of  
316 the counties (Table 1). The resulting management performance map will indicate prioritization  
317 among these counties if decisions for targeting positive selection training are based solely on the  
318 data from Gildemacher et al. (2009).

319 **5) Evaluate the value of information for management intervention or policy.** We  
320 assessed the value of information for decisions about where to invest management interventions,  
321 for a scenario where the estimates from Kromann et al. (2017) do correctly represent the region.  
322 For the purposes of this illustration, we considered cases where decision makers either have or  
323 do not have information about the geographic differences in management performance (Fig. 2).  
324 In the absence of information, they might select any location for management with equal  
325 probability. An estimate of the value of information would be the difference in the benefit of  
326 investment for locations selected based on the information (“informed location selection”), and  
327 the benefit for locations selected randomly (“uninformed location selection”). For example,  
328 informed site selection might direct site selection to farms above or below the altitude threshold  
329 identified in analysis (e.g., 2895 m.a.s.l. identified in Bayesian network analysis), depending on

330 whether higher or lower elevations provide greater benefits. In the case where decision makers  
331 have a prior belief that is not supported by the data, and it is in fact an incorrect belief, the value  
332 of information would be the difference between investment outcomes based on the  
333 misconception (“misinformed location selection”) and outcomes based on informed investments.  
334 For example, there could be a prior belief that a particular pathogen will be more prevalent at  
335 lower elevations, due to a higher abundance of vectors, resulting in a prior belief that positive  
336 selection would be more important at lower elevations. We evaluated uninformed, informed, and  
337 misinformed management choices related to spatially distributed differences in yield, disease,  
338 cultivar and the rates with which best practices are adopted.

339 ***VOI for positive selection targeting in the Andes.*** Comparison of yield improvements  
340 due to positive selection training – with and without the information from Kromann et al. (2017)  
341 – has as a first step determining how common each trait combination is in the landscape being  
342 considered. Then the probability of randomly including a particular trait combination can be  
343 estimated. The proportion of Ecuadorian farmers using certified seed was previously reported at  
344 2% (Devaux et al. 2010b), and many farmers lack access to certified seed, though for some  
345 organized farming groups the proportion using certified or quality-declared seed can be as high  
346 as 46% (Buddenhagen et al. 2017). We take the frequency of farms in this landscape being  
347 planted with certified seed (“new seed”) at any given time as being approximately 2% (so that a  
348 farm drawn at random has probability  $p = 0.02$  of being planted with certified seed, although this  
349 is an approximation because it is generally the wealthier farmers, government programs, or non-  
350 governmental organizations who acquire certified seed). Farm altitude, based on the geographic  
351 analysis described above for higher density potato regions, is above the altitude threshold  
352 identified in recursive partitioning approximately 51% of the time. For simplicity, we treat the

353 potato cultivar planted as 33% INIAP-Fripapa and 66% Superchola, based on estimates for the  
354 province of Tungurahua from Buddenhagen et al. (2017).

355 ***VOI for targeting positive selection in Kenya.*** The average benefit of positive selection  
356 was reported by Gildemacher et al. (2012) as 3.4 tons per ha (~\$350 per ha). This translated to a  
357 per-household benefit of \$156 per season for a farm of average size for the region. Meanwhile,  
358 the cost of training was \$38 per farmer. In this case, the expected first-year benefit was \$44 per  
359 household when training occurred in a randomly selected region (without regard to adoption  
360 rate) (Table 1). We compare this outcome to the outcome using information about frequencies of  
361 adoption.

362 **Integration with another criterion for selecting priority locations: cropland**  
363 **connectivity (Ecuador and Colombia).** The data layer of estimated management performance  
364 is one important factor for deciding where to prioritize management efforts. The management  
365 performance map developed up to this stage is generated pointwise, in that it treats each location  
366 (point) as independent from other locations. However, some locations will have more important  
367 roles in epidemics than others, due to factors such as the location's position in spatial epidemic  
368 networks. Thus, targeting some locations will have more important effects to slow regional  
369 epidemics, for seed degeneration pathogens such as viruses that tend to be spread from one field  
370 to another. We also evaluated the layer of management performance estimates for positive  
371 selection integrated with a data layer of the potato "cropland connectivity risk index", a measure  
372 of the likely importance of locations for spatial movement through potato growing areas (Xing et  
373 al. 2020; Margosian et al. 2009), as described below.

374 The potato cropland connectivity analysis was based on the potato crop harvested area  
375 data from SPAM 2005 v3.2 Global Data (IFPRI and IIASA 2016). This data has pixel resolution



376 5-arc min, and those cells with harvested area greater than 200 ha were included in the cropland  
377 connectivity risk analysis (Xing et al., 2020). As described in more detail in Xing et al. (2020),  
378 the distance between pairs of cells was evaluated in a sensitivity analysis for both inverse power-  
379 law models (parameters 0.5, 1, and 1.5) and negative exponential models (parameters 0.05, 0.1,  
380 0.2, 0.3, and 1). Three network link thresholds (0.001, 0.0001, 0.00001) were applied separately  
381 to each adjacency matrix to represent three different scenarios in the network analysis in a  
382 sensitivity analysis. A cropland connectivity risk index (CCRI) was calculated as the scaled  
383 weighted sum of betweenness centrality, node strength, the sum of nearest neighbours' node  
384 degrees, and eigenvector centrality, as in Xing et al. (2020). For each realization in the sensitivity  
385 analysis, the mean CCRI was evaluated across the 24 parameter combinations. This mean CCRI  
386 was then mapped in combination with the map of management performance estimates, to  
387 identify locations important both for the CCRI (indicating a potentially important epidemic role)  
388 and for management benefits from positive selection.

389

## 390 **RESULTS**

### 391 **3) Identifying predictor variables for management performance**

#### 392 *Positive selection and yield for Andean potato.*

393 *In the recursive partitioning analysis,* higher per plant yields were generally obtained  
394 from INIAP-Fripapa (compared to Superchola) in the first two years after the certified seed was  
395 purchased, the highest yields being obtained for altitudes over 3278 m (Fig. 3). The highest  
396 yields for Superchola were found above 2895 m altitude. If a farmer can afford to replace seed  
397 more frequently, and the farm is over 3200 m, INIAP-Fripapa yielded higher than Superchola

398 (and their value in the market was comparable in 2016 – 0.29 and 0.33 USD per kg,  
399 respectively).

400 Plants three years post-certified seed purchase yielded 33% less per plant. The benefits of  
401 positive selection allow yields to approach the average yields for recently purchased certified  
402 seed. There were no differences with respect to cultivar three years after certified seed purchase,  
403 suggesting positive selection was equally valuable in both varieties for seed that had gone  
404 through more than two planting cycles.

405 *The Bayesian network analysis* indicated that high yielding plants were found more  
406 commonly in plots where first generation certified seed was used, at higher altitudes, for the  
407 INIAP-Fripapa cultivar, and where there was a lower minimum temperature and higher rainfall  
408 six months after planting, as well as low levels of PVX, PLRV, and PVY (Fig. 4). Positive  
409 selection was less likely to be the management implemented if the yield was low. All the viruses  
410 except PVY, and PLRV for low yield plants, were more likely to be absent (frequency = 0) than  
411 present. Each virus was relatively more likely to be absent if a plant was in the high yield  
412 category compared to plants in the low yield category (Fig. 4). The uncertainty was high  
413 compared to the observed values, indicating that another cycle of data collection would be  
414 needed before implementing project plans based on this data.

415 *Adoption of positive selection for Kenyan potato.* This analysis was based on the  
416 probability of adoption of positive selection, where higher adoption rates resulted in a higher  
417 payoff for intervention investment. Adoption rates were 46, 19 and 18% in three counties (Table  
418 1) (Gildemacher et al. 2012, 2011). Thus, based on this measure alone, selection of the county  
419 with 46% adoption rate would approximately double the benefits obtained from a training  
420 intervention focused only where there was 18% or 19% adoption.

421           **4) Estimating management performance across the geographic study region, and**  
422 **integrating with cropland connectivity estimates.**

423           *Applying models to a map of the relevant region and integrating data layers for*

424 *Andean potato.* The mapped estimates of the management performance of positive selection for  
425 Andean potato yield (based on altitude) and the locations where potato cropland connectivity risk  
426 was highest based on the CCRI (Fig. 5) were combined to identify locations both (a)  
427 independently likely to have the best management outcomes, and (b) likely important for  
428 regional management of disease spread (high CCRI). Locations that meet both criteria were  
429 observed near the border of Ecuador and Colombia, and near Ambato and Riobamba in Ecuador  
430 (Fig. 5).

431           *Technology adoption rates for three counties in Kenya.* The county with the highest  
432 adoption rate for positive selection, Nakuru (Table 1), was intermediate in terms of the cropland  
433 connectivity index (Fig. 6). The cropland connectivity index was high for multiple locations in  
434 and near Nyandarua county.

435           **5) Evaluate the value of information for management intervention or policy.**

436           *VOI for targeted implementation of positive selection (yield as response, Bayesian*

437 *networks to identify predictors)* For equivalent farm sizes above and below 2895 m

438 (representing 49% of the area), we estimated the benefit of training under uninformed (random)  
439 site selection by using the weighted mean of the benefit above and below 2895 m.a.s.l.

440 (representing 51% of the cultivated area), which is 6.5 t/ha ( $0.51 * 7.7 + 0.49 * 3.2 = 6.5$ ).

441           The estimated benefit under informed site selection, selecting locations above 2895 m, is  
442 7.7 t/ha – a difference of 1.2 t/ha from random site selection. Under misinformed site selection,  
443 if the assumption was that positive selection provides more benefits at low altitude (perhaps due

444 to greater pathogen load), then the benefit is 3.2 tons per ha, 4.5 tons per ha less than the optimal  
445 allocation, and 3.3 tons per ha less than the uninformed (random) site selection option.

446 ***VOI for targeted implementation of positive selection (yield as response, recursive***  
447 ***partitioning to identify predictors)*** Assuming that positive selection training targeted farmers  
448 randomly with respect to the observed frequency of the categories, the weighted mean benefit of  
449 positive selection would be 8.7 tons per ha (Fig. 3). Preferentially targeting sites at high altitude  
450 (but sampling randomly with respect to seed age and cultivar) provides higher benefits (9  
451 tons/ha), otherwise targeting low altitude sites provides lower returns at (8.3 tons/ha). Targeting  
452 farmers who plant farm-saved seed, three years since purchase of certified seed, provides little  
453 benefit: 8.8 tons/ha compared to random targeting of farmers (under the scenario where use of  
454 certified seed is rare at 2%). Targeting the 2% that do use new seed provides a benefit of 3.1  
455 tons/ha, although these more successful farmers may not need interventions. By far the greatest  
456 benefit is provided by targeting farmers that grow INIAP-Fripapa (benefit of 10.9 tons/ha) as  
457 opposed to Superchola (benefit of 7.6 tons/ha).

458 ***Regional differences in adoption of training recommendations in Kenya.*** In the  
459 example of Kenyan potato seed technology adoption, targeted selection of high adoption rate  
460 areas for training (where the per-farmer benefit was \$72) would increase the return by \$28 per  
461 farmer trained (Table 1). Realized benefits would vary depending on the farm size.

462

## 463 **DISCUSSION**

464 The examples given here show how management performance mapping can be used to  
465 target sites for project interventions. We illustrate how identifying locations where positive  
466 selection of on-farm saved seed has the highest performance for increasing yield (Andes) or the

467 highest adoption rates (Kenya) can provide substantial regional benefits. While the particular  
468 examples here would require additional information to advance to the field with confidence  
469 (steps 6 through 8 in Fig. 1), they illustrate how a management performance mapping framework  
470 can be implemented. An NGO or government extension agency with limited resources could use  
471 such an approach to better target rural development interventions. We compared uninformed and  
472 informed allocation of resources, for scenarios where the management performance models are  
473 correct (i.e., scenarios where the data perfectly represent the region of interest), to assess the  
474 value of the information used for targeting interventions. In a simple scenario, using Bayesian  
475 network analysis to identify altitude as a management performance predictor, we found that the  
476 benefit of positive seed selection was highest (an increase of 4.5 tons per ha) at high altitudes,  
477 and uninformed allocation of farmer training would provide a net benefit of 1.2 tons per ha less  
478 than targeted training. Incorrectly assuming that better outcomes for positive selection would be  
479 obtained at lower altitudes, perhaps because aphid vector abundances were thought to be higher,  
480 would have produced 3.3 and 4.5 tons per ha less for random site selection and optimal  
481 allocation, respectively, for this scenario (Bertschinger et al. 2017).

482         Along with the magnitude of management effects on yield, adoption rates are also key to  
483 successful interventions (Parsa et al. 2014). Based on the data about the benefits of adoption  
484 rates of positive selection of seed in Kenya, we found that unless adoption rates were higher than  
485 24%, the first-year benefit per household would not exceed the \$38 per farmer cost of training  
486 (although, presumably, the benefits would continue to accrue in subsequent years). Also, random  
487 allocation of training effort would only yield a \$44 benefit (over the cost of the training) per  
488 household. Gildemacher et al. (2017) also point out that adoption rates were lower in drought  
489 years, suggesting that prediction of adoption rates could be difficult if based on regional patterns

490 in a single year. Observed adoption rates may vary in predictable ways based on disease  
491 incidence in the current or previous season, in-season weather conditions, language spoken,  
492 literacy, cultural differences between trainer and trainee, wealth or other factors. When these  
493 relationships are understood and spatial data are available for key predictor variables for  
494 adoption, these variables could form a part of selection criteria for farmer training initiatives (and  
495 the approach to the training could be altered to improve adoption rates).

496 Our example decision, deciding where to implement training for improved disease  
497 management, represents a class of decisions where there is confidence that the activity will  
498 provide a benefit. Management performance mapping is applied to guide implementation to  
499 locations where there is some evidence that the benefit will be greater than in other locations.  
500 For this class of decisions, the risk is often low that limited data is “worse than no data at all”. In  
501 the management performance mapping context, the null hypothesis is often that the benefit of  
502 implementation will be the same in all locations. In evaluating where there is evidence to reject  
503 this hypothesis, there is not a strong motivation to particularly avoid false positives or Type I  
504 error (rejecting a null hypothesis when the null hypothesis is true), because a false negative or  
505 Type II error (failing to reject a null hypothesis when the null hypothesis is false) is arguably just  
506 as bad. The main risk of “bad data” would be from data with a strong bias that would lead to  
507 misinformed decisions. The cost of “bad data” may also go up if the logistical costs (of  
508 transport, communications, etc.) of targeting locations incorrectly identified is higher than  
509 targeting locations at random or selecting locations based on convenience. There is the potential  
510 for these risks to be managed in real time during project implementation by incorporating  
511 distributed or “big” data sourced from farmer phone apps, rapid disease detection methods or  
512 citizen science initiatives (Nakato et al. 2016; Boykin et al. 2019). In our example data from

513 Ecuador, our only estimate of uncertainty within a scenario was based on variability among  
514 individual plants, while a person making decisions about regional priorities would strongly  
515 prefer to have information about farm-to-farm variability within each scenario. One of the  
516 potential applications of VOI analysis is to determine whether collecting more or better data  
517 about management performance is justified (Ades et al. 2004), not just for the sake of more  
518 statistical power in general, but because the information improves farmer decision-making under  
519 a realistic range of conditions.

520         Two key factors for adoption of positive selection are market price and the varieties  
521 grown in a region, in terms of their rates of seed degeneration. The number of seasons over  
522 which positive selection is adopted is also an important factor helping to determine the return on  
523 investment in training. The study of adoption rates in Kenya was performed once and may be  
524 limited to the circumstances at the time of sampling. At the time of the training in positive  
525 selection, there was a shift in Nyandarua from the variety Tigoni to Shangi, so there might have  
526 been more interest in acquiring the new variety than in improving old seed stock (Okello et al.  
527 2018; Kaguongo et al. 2008). Nyandarua also has an apparent role in spread of potato cyst  
528 nematode in the region (Mburu et al. 2018; Mwangi et al. 2015), along with bacterial wilt  
529 problems, which may have made positive selection less effective there. Potato farming has a  
530 longer history in Nyandarua. In Narok, potatoes are less important and conditions are less  
531 favorable, with the main potato variety grown being Dutch Robijn. In Nakuru, with the highest  
532 adoption rate, more varieties are grown and potato farming is more recent, in generally good  
533 growing conditions. These differing factors in the three counties, combined with changes over  
534 time such as the occurrence of droughts, can modify the likelihood of adoption of positive  
535 selection. The yield improvements from positive selection in Kenya, averaging 30% (Schulte-

536 Geldermann et al. 2012), make it an attractive technology for development investments. In this  
537 system, there is the possibility of farmers actually improving seed quality over time, rather than  
538 simply slowing decline, and understanding this potential could also support decisions.  
539 Formulating a strategy for targeting positive selection in Kenya would be strengthened by new  
540 data about how the differences among these and other counties influence the current likelihood  
541 of technology adoption.

542 Combining data layers for evaluating optimal intervention strategies can provide more  
543 insight, along with potential challenges due to uncertainty and different spatial resolutions  
544 (Sutton and Armsworth 2014). Evaluating the risk of disease due to cropland connectivity (Xing  
545 et al. 2020) in combination with independent location characteristics can position the analysis in  
546 the larger context of disease management for the region. Cropland connectivity may change  
547 over the course of the year, as potato is present or absent. For example, in Kenya some parts of  
548 Nyandarua county, such as Njambini and Oljororok, have potato in the field the entire year, due  
549 to the availability of groundwater coming from the Aberdare range during the dry season. Three  
550 crops a year are very common, and likely affect pest and disease cycles. Consistently highly  
551 connected locations may be more important targets for achieving impacts on regional epidemic  
552 spread, although there is also the potential for highly connected locations experiencing high  
553 inoculum loads to respond poorly to some types of management. A broader systems analysis –  
554 for example, impact network analysis (Garrett et al. 2018) which integrates across management  
555 performance, socioeconomic or innovation networks (Fritsch and Kauffeld-Monz 2010; Leeuwis  
556 and Aarts 2011), and biophysical networks such as epidemic networks – can aid in identifying  
557 intervention locations that prioritize across multiple goals. For farmer decision making, flexible



558 decision rules and reducing variability of risk may be priorities (Bert et al. 2006; Andrieu et al.  
559 2015).

560 Crop and epidemic models may provide valuable data layers if they incorporate spatially  
561 mappable variables. Estimating the effects of management strategies, such as variety  
562 deployment, depends on understanding the yield potential, perhaps based on a combination of  
563 weather or climate data and data about regional management practices (van Wart, van Bussel, et  
564 al. 2013; Araya et al. 2010; Reynolds et al. 2018). Disease modeling may be used to evaluate the  
565 likely effects of management, such as addressing the problem of seed degeneration (Thomas-  
566 Sharma et al. 2017; Jones et al. 2010). Spatial epidemic components such as seed trade networks  
567 (McQuaid et al. 2017; Buddenhagen et al. 2017; Andersen et al. 2019) may also be valuable  
568 components of more refined management performance mapping.

569 Management performance mapping to identify target locations for interventions, and the  
570 VOI analysis therein, is potentially useful for many problems in agriculture or intervention  
571 ecology. There is a constellation of approaches that address related goals. Yield gap analyses that  
572 incorporate maps can address some of the same goals as management performance mapping  
573 (Schulthess et al. 2013; Silva et al. 2017; Lobell et al. 2015, 2009; van Ittersum et al. 2016;  
574 Grassini et al. 2015; van Bussel et al. 2015). For example, yield gap analysis attempts to identify  
575 the most important factors that influence yield, especially factors that are controllable. The focus  
576 of management performance mapping for intervention targeting, however, is on providing spatial  
577 information about the intervention impact of management options. Management performance  
578 maps would ideally incorporate and account for interacting human dimensions (e.g., learning,  
579 financial liquidity, capital, institutions; Arneth et al. 2014), as well.

580           The benefits from management performance mapping may be enhanced if maps and VOI  
581 calculations are updated with new information sources over time in an adaptive management  
582 scheme (Shea et al. 2014; Bennett et al. 2018). Empirical data can be supplemented with  
583 models, expert opinion, and local knowledge (Petsakos et al. 2018; Tulloch et al. 2014) to  
584 understand changes in factors such as pesticide resistance, new varieties, and new management  
585 such as irrigation. Projects may expand due to new stakeholder priorities and new situations on  
586 the ground. As new pests and pathogens enter a region (Bebber et al. 2014), they will likely  
587 necessitate alterations in current best management practices. For example, in Ecuador potato  
588 purple top disease has become a major problem (Caicedo et al. 2015; Castillo-Carrillo et al.  
589 2018) since the Ecuadorian experiments reported here were performed. ‘*Candidatus Liberibacter*  
590 *solanacearum*’, associated with zebra chip disease, and its vector the tomato potato psyllid,  
591 *Bactericera cockerelli*, have also been reported in Ecuador (Caicedo et al. 2020; Castillo-Carrillo  
592 et al. 2019). New strategies for potato best management practices in Ecuador will need to  
593 address purple top and the risk of zebra chip, including uncertainty about causal agents. In other  
594 scenarios, multiple outcomes may be important, such as a combination of benefits and  
595 environmental costs of management (Laurance et al. 2014), pesticide effects on non-target  
596 species in disease management, or conservation management focusing on both biodiversity  
597 hotspots and locations with keystone species (Smith et al. 2007). Our examples addressed  
598 management performance mapping with performance defined in terms of the mean performance  
599 observed. Other potential criteria for selecting regions for investment might emphasize different  
600 priorities (Table 2). For example, effective altruism concepts can be used to target stakeholders  
601 to maximize research benefit (Garrett et al. 2020).

602           In summary, management performance mapping provides a process to extrapolate from  
603 available data to make evidence-based decisions about where to invest in disease and crop  
604 management or training initiatives. Scenario analyses to support decision making (Wiebe et al.  
605 2018) can build on the framework developed here.

606

## 607 **ACKNOWLEDGMENTS**

608 This research was undertaken as part of, and funded by, the CGIAR Research Program on Roots,  
609 Tubers and Bananas (RTB) and supported by CGIAR Trust Fund contributors  
610 <https://www.cgiar.org/funders/>. We also appreciate support by the CGIAR Research Program on  
611 Climate Change and Food Security (CCAFS), Bill and Melinda Gates Foundation grant  
612 OPP1080975, USDA NIFA grant 2015-51181-24257, USDA APHIS grant 11-8453-1483-CA,  
613 the USAID Feed the Future Haiti Appui à la Recherche et au Développement Agricole (AREA)  
614 project grant AID-OAA-A-15-00039, US NSF Grant EF-0525712 as part of the joint NSF-NIH  
615 Ecology of Infectious Disease program, US NSF Grant DEB-0516046, and the University of  
616 Florida.  
617

618 **LITERATURE CITED**

619

620 Ades, A. E., Lu, G., and Claxton, K. 2004. Expected value of sample information calculations in  
621 medical decision modeling. *Med Decis Making*. 24:207–227.

622 Aguilera, P. A., Fernández, A., Fernández, R., Rumí, R., and Salmerón, A. 2011. Bayesian  
623 networks in environmental modelling. *Environmental Modelling & Software*. 26:1376–  
624 1388.

625 Almekinders, C. J. M., Louwaars, N. P., and de Bruijn, G. H. 1994. Local seed systems and their  
626 importance for an improved seed supply in developing countries. *Euphytica*. 78:207–216.

627 Almekinders, C. J. M., Walsh, S., Jacobsen, K. S., Andrade-Piedra, J. L., McEwan, M. A., de  
628 Haan, S., et al. 2019. Why interventions in the seed systems of roots, tubers and bananas  
629 crops do not reach their full potential. *Food Sec*. 11:23–42.

630 Altieri, M. A., and Nicholls, C. I. 2008. Scaling up agroecological approaches for food  
631 sovereignty in Latin America. *Development*. 51:472–480.

632 Andersen, K. F., Buddenhagen, C. E., Rachkara, P., Gibson, R., Kalule, S., Phillips, D., et al.  
633 2019. Modeling Epidemics in Seed Systems and Landscapes To Guide Management  
634 Strategies: The Case of Sweet Potato in Northern Uganda. *Phytopathology*. 109:1519–  
635 1532.

636 Andrieu, N., Descheemaeker, K., Sanou, T., and Chia, E. 2015. Effects of technical interventions  
637 on flexibility of farming systems in Burkina Faso: Lessons for the design of innovations  
638 in West Africa. *Agricultural Systems*. 136:125–137.

639 Araya, A., Keesstra, S. D., and Stroosnijder, L. 2010. A new agro-climatic classification for crop  
640 suitability zoning in northern semi-arid Ethiopia. *Agricultural and Forest Meteorology*.  
641 150:1057–1064.

642 Arneth, A., Brown, C., and Rounsevell, M. D. A. 2014. Global models of human decision-  
643 making for land-based mitigation and adaptation assessment. *Nature Clim Change*.  
644 4:550–557.

645 Asante Bright Owusu, Otoo Emmanuel, Wiredu Alexander Nana, Acheampong Patricia, Osei-  
646 Adu Jonas, and Nsiah-Frimpong Benedicta. 2011. Willingness to adopt the vine  
647 multiplication technique in seed yam production in the forest savanna transition agro-  
648 ecological zone, Ghana. *Journal of Development and Agricultural Economics*. 3:710–719.

649 Austin, M. 2007. Species distribution models and ecological theory: A critical assessment and  
650 some possible new approaches. *Ecological Modelling*. 200:1–19.

651 Bebbler, D. P., Holmes, T., and Gurr, S. J. 2014. The global spread of crop pests and pathogens:  
652 The global spread of crop pests and pathogens. *Global Ecology and Biogeography*.  
653 23:1398–1407.

654 Bennett, J. R., Maxwell, S. L., Martin, A. E., Chadès, I., Fahrig, L., and Gilbert, B. 2018. When  
655 to monitor and when to act: Value of information theory for multiple management units  
656 and limited budgets ed. Hedley Grantham. *J Appl Ecol*. 55:2102–2113.

657 Bentley, J. W., and Vasques, D. 1998. The seed potato system in Bolivia: organisational growth  
658 and missing links. *Agricultural Research and Extension Network*. :1–12.

659 Bert, F. E., Satorre, E. H., Toranzo, F. R., and Podestá, G. P. 2006. Climatic information and  
660 decision-making in maize crop production systems of the Argentinean Pampas.  
661 *Agricultural Systems*. 88:180–204.

- 662 Bertschinger, L., Bühler, L., Dupuis, B., Duffy, B., Gessler, C., Forbes, G. A., et al. 2017.  
663 Incomplete infection of secondarily infected potato plants—an environment dependent  
664 underestimated mechanism in plant virology. *Frontiers in Plant Science*. 8:74.
- 665 Bourdôt, G. W., and Lamoureaux, S. L. 2019. *Abutilon theophrasti*—a comparison of two climate  
666 niche models. *New Zealand Journal of Agricultural Research*. :1–12.
- 667 Boykin, Sseruwagi, Alicai, Ateka, Mohammed, Stanton, et al. 2019. Tree lab: portable genomics  
668 for early detection of plant viruses and pests in Sub-Saharan Africa. *Genes*. 10:632.
- 669 Breidert, C., Hahsler, M., and Reutterer, T. 2006. A review of methods for measuring  
670 willingness-to-pay. *Innovative Marketing*. 2:8–32.
- 671 Buddenhagen, C. E., Hernandez Nopsa, J. F., Andersen, K. F., Andrade-Piedra, J., Forbes, G. A.,  
672 Kromann, P., et al. 2017. Epidemic network analysis for mitigation of invasive pathogens  
673 in seed systems: Potato in Ecuador. *Phytopathology*. 107:1209–1218.
- 674 van Bussel, L. G. J., Grassini, P., Van Wart, J., Wolf, J., Claessens, L., Yang, H., et al. 2015.  
675 From field to atlas: Upscaling of location-specific yield gap estimates. *Field Crops  
676 Research*. 177:98–108.
- 677 Caicedo, J., Crizón, M., Pozo, A., Cevallos, A., Simbaña, L., Rivera, L., et al. 2015. First report  
678 of “*Candidatus Phytoplasma aurantifolia*” (16SrII) associated with potato purple top in  
679 San Gabriel-Carchi, Ecuador. *New Dis. Rep.* 32:20.
- 680 Caicedo, J. D., Simbaña, L. L., Calderón, D. A., Lalangui, K. P., and Rivera-Vargas, L. I. 2020.  
681 First report of ‘*Candidatus Liberibacter solanacearum*’ in Ecuador and in South America.  
682 *Australasian Plant Dis. Notes*. 15:6.
- 683 Caley, P., and Kuhnert, P. M. 2006. Application and evaluation of classification trees for  
684 screening unwanted plants. *Austral Ecology*. 31:647–655.
- 685 Canessa, S., Guillera-Aroita, G., Lahoz-Monfort, J. J., Southwell, D. M., Armstrong, D. P.,  
686 Chadès, I., et al. 2015. When do we need more data? A primer on calculating the value of  
687 information for applied ecologists ed. Olivier Gimenez. *Methods in Ecology and  
688 Evolution*. 6:1219–1228.
- 689 Castillo-Carrillo, C., Fu, Z., and Burckhardt, D. 2019. First record of the tomato potato psyllid  
690 *Bactericera cockerelli* from South America. *Bulletin of Insectology*. 72:85–91.
- 691 Castillo-Carrillo, C., Paltrinieri, S., Bustamante, J. B., and Bertaccini, A. 2018. Detection and  
692 molecular characterization of a 16SrI-F phytoplasma in potato showing purple top disease  
693 in Ecuador. *Australasian Plant Pathol.* 47:311–315.
- 694 Choudhury, R. A., Garrett, K. A., Klosterman, S. J., Subbarao, K. V., and McRoberts, N. 2017.  
695 A framework for optimizing phytosanitary thresholds in seed systems. *Phytopathology*.  
696 107:1219–1228.
- 697 Cook, S., O’Brien, R., Corner, R., Oberthur, T., Stafford, J., and Werner, A. 2003. Is precision  
698 agriculture irrelevant to developing countries. *Precision Agriculture*. :115–120.
- 699 Danthine, J.-P. 1978. Information, futures prices, and stabilizing speculation. *Journal of  
700 Economic Theory*. 17:79–98.
- 701 Devaux, A., Ordinola, M. E., Hibon, A., and Flores, F. A. 2010a. *El sector papa en la región  
702 andina: Diagnóstico y elementos para una visión estratégica (Bolivia, Ecuador y Perú)*.  
703 International Potato Center.
- 704 Devaux, A., Ordinola, M. E., Hibon, A., and Flores, F. A. 2010b. *El sector papa en la región  
705 andina: Diagnóstico y elementos para una visión estratégica (Bolivia, Ecuador y Perú)*.  
706 International Potato Center.

- 707 Etter, A., McAlpine, C., Wilson, K., Phinn, S., and Possingham, H. 2006. Regional patterns of  
708 agricultural land use and deforestation in Colombia. *Agriculture, Ecosystems &*  
709 *Environment*. 114:369–386.
- 710 Fick, S. E., and Hijmans, R. J. 2017. Worldclim 2: new 1-km spatial resolution climate surfaces  
711 for global land areas: new climate surfaces for global land areas. *Int. J. Climatol.*  
712 37:4302–4315.
- 713 Fritsch, M., and Kauffeld-Monz, M. 2010. The impact of network structure on knowledge  
714 transfer: an application of social network analysis in the context of regional innovation  
715 networks. *The Annals of Regional Science*. 44:21–38.
- 716 Garrett, K. A., Alcalá-Briseño, R. I., Andersen, K. F., Brawner, J., Choudhury, R. A., Delaquis,  
717 E., et al. 2020. Effective altruism as an ethical lens on research priorities. *Phytopathology*.  
718 110:708–722.
- 719 Garrett, K. A., Alcalá-Briseño, R. I., Andersen, K. F., Buddenhagen, C. E., Choudhury, R. A.,  
720 Fulton, J. C., Hernandez Nopsa, J. F., Poudel, R., and Xing, Y. 2018. Network analysis:  
721 A systems framework to address grand challenges in plant pathology. *Annual Review of*  
722 *Phytopathology* 56:559-580.
- 723 Geenen, P. L., and Van Der Gaag, L. C. 2005. Developing a Bayesian network for clinical  
724 diagnosis in veterinary medicine: from the individual to the herd. In *Proceedings of the*  
725 *Third Bayesian Modelling Applications Workshop; Edinburgh*, Citeseer.
- 726 Gildemacher, P. R., Demo, P., Barker, I., Kaguongo, W., Woldegiorgis, G., Wagoire, W. W., et  
727 al. 2009. A description of seed potato systems in Kenya, Uganda and Ethiopia. *American*  
728 *Journal of Potato Research*. 86:373–382.
- 729 Gildemacher, P. R., Leeuwis, C., Demo, P., Borus, D., Schulte-Geldermann, E., Mundia, P., et al.  
730 2012. Positive selection in seed potato production in Kenya as a case of successful  
731 research-led innovation. *International Journal of Technology Management & Sustainable*  
732 *Development*. 11:67–92.
- 733 Gildemacher, P. R., Schulte-Geldermann, E., Borus, D., Demo, P., Kinyae, P., Mundia, P., et al.  
734 2011. Seed potato quality improvement through positive selection by smallholder farmers  
735 in Kenya. *Potato Research*. 54:253–266.
- 736 Grassini, P., van Bussel, L. G. J., Van Wart, J., Wolf, J., Claessens, L., Yang, H., et al. 2015.  
737 How good is good enough? Data requirements for reliable crop yield simulations and  
738 yield-gap analysis. *Field Crops Research*. 177:49–63.
- 739 Hanemann, W. M. 1991. Willingness to pay and willingness to accept: how much can they differ?  
740 *The American Economic Review*. 81:635–647.
- 741 Hijmans, R. J., and Graham, C. H. 2006. The ability of climate envelope models to predict the  
742 effect of climate change on species distributions. *Global Change Biology*. 12:2272–2281.
- 743 Hirshleifer, J., and Riley, J. G. 1979. The analytics of uncertainty and information-an expository  
744 survey. *Journal of Economic Literature*. 17:1375–1421.
- 745 Howes, A. L., Maron, M., and McAlpine, C. A. 2010. Bayesian networks and adaptive  
746 management of wildlife habitat: Bayesian networks and adaptive management.  
747 *Conservation Biology*. 24:974–983.
- 748 IFPRI, and IIASA. 2016. *Global Spatially-Disaggregated Crop Production Statistics Data for*  
749 *2005. Version 3.2*. International Food Policy Research Institute (IFPRI) and International  
750 Institute for Applied Systems Analysis (IIASA). Available at:  
751 <https://doi.org/10.7910/DVN/DHXBjX>.



- 752 van Ittersum, M. K., van Bussel, L. G. J., Wolf, J., Grassini, P., van Wart, J., Guilpart, N., et al.  
753 2016. Can sub-Saharan Africa feed itself? *Proceedings of the National Academy of*  
754 *Sciences*. 113:14964–14969.
- 755 Jaffee, S., and Srivastava, J. 1994. The roles of the private and public sectors in enhancing the  
756 performance of seed systems. *The World Bank Research Observer*. 9:97–117.
- 757 Johnson, F. A., Smith, B. J., Bonneau, M., Martin, J., Romagosa, C., Mazzotti, F., et al. 2017.  
758 Expert elicitation, uncertainty, and the value of information in controlling invasive  
759 species. *Ecological Economics*. 137:83–90.
- 760 Jones, R. A. C., Salam, M. U., Maling, T. J., Diggle, A. J., and Thackray, D. J. 2010. Principles  
761 of predicting plant virus disease epidemics. *Annu. Rev. Phytopathol.* 48:179–203.
- 762 Kaguongo, W., Gildemacher, P., Demo, P., Wagoire, W., Kinyae, P., Andrade, J., et al. 2008.  
763 *Farmer practices and adoption of improved potato varieties in Kenya and Uganda*. Lima,  
764 Peru: International Potato Center.
- 765 Kristensen, K., and Rasmussen, I. A. 2002. The use of a Bayesian network in the design of a  
766 decision support system for growing malting barley without use of pesticides. *Computers*  
767 *and Electronics in Agriculture*. 33:197–217.
- 768 Kromann, P., Andrade-Piedra, J. L., Navarrete, I., Taipe, A., and Gómez, J. 2017. Dataset for:  
769 Potato seed degeneration in Ecuador. International Potato Center Dataverse, V2.  
770 Available at: <http://dx.doi.org/10.21223/P3/3CT90C> [Accessed December 1, 2017].
- 771 Langemeier, C. B., Robertson, A. E., Wang, D., Jackson-Ziems, T. A., and Kruger, G. R. 2016.  
772 Factors affecting the development and severity of Goss's bacterial wilt and leaf blight of  
773 corn, caused by *Clavibacter michiganensis* subsp. *nebraskensis*. *Plant Disease*. 101:54–  
774 61.
- 775 Laurance, W. F., Clements, G. R., Sloan, S., O'Connell, C. S., Mueller, N. D., Goosem, M., et al.  
776 2014. A global strategy for road building. *Nature*. 513:229–232.
- 777 Lave, L. B. 1963. The value of better weather information to the raisin industry. *Econometrica*.  
778 31:151–164.
- 779 Leeuwis, C., and Aarts, N. 2011. Rethinking Communication in Innovation Processes: Creating  
780 Space for Change in Complex Systems. *The Journal of Agricultural Education and*  
781 *Extension*. 17:21–36.
- 782 Lobell, D. B., Cassman, K. G., and Field, C. B. 2009. Crop yield gaps: their importance,  
783 magnitudes, and causes. *Annual Review of Environment and Resources*. 34:179–204.
- 784 Lobell, D. B., Thau, D., Seifert, C., Engle, E., and Little, B. 2015. A scalable satellite-based crop  
785 yield mapper. *Remote Sensing of Environment*. 164:324–333.
- 786 Louwaars, N. P., de Boef, W. S., and Edeme, J. 2013. Integrated seed sector development in  
787 Africa: a basis for seed policy and law. *Journal of Crop Improvement*. 27:186–214.
- 788 Macauley, M. K. 2006. The value of information: Measuring the contribution of space-derived  
789 earth science data to resource management. *Space Policy*. 22:274–282.
- 790 Margosian, M. L., Garrett, K. A., Hutchinson, J. S., and With, K. A. 2009. Connectivity of the  
791 American agricultural landscape: assessing the national risk of crop pest and disease  
792 spread. *BioScience*. 59:141–151.
- 793 Mburu, H., Cortada, L., Mwangi, G., Gitau, K., Kiriga, A., Kinyua, Z., et al. 2018. First Report  
794 of Potato Cyst Nematode *Globodera pallida* Infecting Potato (*Solanum tuberosum*) in  
795 Kenya. *Plant Disease*. 102:1671–1671.
- 796 McGuire, S., and Sperling, L. 2013. Making seed systems more resilient to stress. *Global*  
797 *Environmental Change*. 23:644–653.

- 798 McGuire, S., and Sperling, L. 2016. Seed systems smallholder farmers use. *Food Security*.  
799 8:179–195.
- 800 McQuaid, C. F., van den Bosch, F., Szyntyszewska, A., Alicai, T., Pariyo, A., Chikoti, P. C., et al.  
801 2017. Spatial dynamics and control of a crop pathogen with mixed-mode transmission.  
802 *PLOS Computational Biology*. 13:e1005654.
- 803 McQuaid, C. F., Sseruwagi, P., Pariyo, A., and van den Bosch, F. 2016. Cassava brown streak  
804 disease and the sustainability of a clean seed system. *Plant Pathology*. 65:299–309.
- 805 Mwangi, J. M., Kariuki, G. M., Waceke, J. W., and Grundler, F. M. 2015. First report of  
806 *Globodera rostochiensis* infesting potatoes in Kenya. *New Disease Reports*. 31:18–18.
- 807 Nagarajan, R., Scutari, M., and Lèbre, S. 2013. *Bayesian networks in R with applications in*  
808 *systems biology*. New York: Springer-Verlag.
- 809 Nakato, G. V., Beed, F., Bouwmeester, H., Ramathani, I., Mpiira, S., Kubiriba, J., et al. 2016.  
810 Building agricultural networks of farmers and scientists via mobile phones: case study of  
811 banana disease surveillance in Uganda. *Canadian Journal of Plant Pathology*. 38:307–316.
- 812 Novak, M. P., and LaDue, E. 1999. Application of recursive partitioning to agricultural credit  
813 scoring. *Journal of Agricultural and Applied Economics*. 31:109–122.
- 814 Okello, J. J., Lagerkvist, C. J., Kakuhenzire, R., Parker, M., and Schulte-Geldermann, E. 2018.  
815 Combining means-end chain analysis and goal-priming to analyze Tanzanian farmers’  
816 motivations to invest in quality seed of new potato varieties. *British Food Journal*.  
817 120:1430–1445.
- 818 Parsa, S., Morse, S., Bonifacio, A., Chancellor, T. C. B., Condori, B., Crespo-Perez, V., et al.  
819 2014. Obstacles to integrated pest management adoption in developing countries.  
820 *Proceedings of the National Academy of Sciences*. 111:3889–3894.
- 821 Paul, P. A., and Munkvold, G. P. 2004. A model-based approach to preplanting risk assessment  
822 for gray leaf spot of maize. *Phytopathology*. 94:1350–1357.
- 823 Perez-Ariza, C. B., Nicholson, A. E., and Flores, M. J. 2012. Prediction of coffee rust disease  
824 using Bayesian networks. In *Proceedings of the Sixth European Workshop on*  
825 *Probabilistic Graphical Models*, , p. 259–266.
- 826 Petsakos, A., Hareau, G., Kleinwechter, U., Wiebe, K., and Sulser, T. B. 2018. Comparing  
827 modeling approaches for assessing priorities in international agricultural research.  
828 *Research Evaluation*. 27:145–156.
- 829 Phillips, C. B., Kean, J. M., Vink, C. J., and Berry, J. A. 2018. Utility of the CLIMEX ‘match  
830 climates regional’ algorithm for pest risk analysis: an evaluation with non-native ants in  
831 New Zealand. *Biol Invasions*. 20:777–791.
- 832 Reynolds, M., Kropff, M., Crossa, J., Koo, J., Kruseman, G., Molero Milan, A., et al. 2018. Role  
833 of Modelling in International Crop Research: Overview and Some Case Studies.  
834 *Agronomy*. 8:291.
- 835 Schulte-Geldermann, E., Gildemacher, P. R., and Struik, P. C. 2012. Improving seed health and  
836 seed performance by positive selection in three Kenyan potato varieties. *Am. J. Potato*  
837 *Res.* 89:429–437.
- 838 Schulthess, U., Timsina, J., Herrera, J. M., and McDonald, A. 2013. Mapping field-scale yield  
839 gaps for maize: An example from Bangladesh. *Field Crops Research*. 143:151–156.
- 840 Shea, K., Tildesley, M. J., Runge, M. C., Fonnesbeck, C. J., and Ferrari, M. J. 2014. Adaptive  
841 management and the value of information: learning via intervention in epidemiology ed.  
842 Andrew P. Dobson. *PLoS Biol.* 12:e1001970.



- 843 Sheppard, C. S., Burns, B. R., and Stanley, M. C. 2014. Predicting plant invasions under climate  
844 change: are species distribution models validated by field trials? *Glob Change Biol.*  
845 20:2800–2814.
- 846 Silva, J. V., Reidsma, P., Laborte, A. G., and van Ittersum, M. K. 2017. Explaining rice yields  
847 and yield gaps in Central Luzon, Philippines: An application of stochastic frontier  
848 analysis and crop modelling. *European Journal of Agronomy.* 82:223–241.
- 849 Smith, C. S., Howes, A. L., Price, B., and McAlpine, C. A. 2007. Using a Bayesian belief  
850 network to predict suitable habitat of an endangered mammal – The Julia Creek dunnart  
851 (*Sminthopsis douglasi*). *Biological Conservation.* 139:333–347.
- 852 Sperling, L. 2008. *When Disaster Strikes: a guide to assessing seed system security.* CIAT.
- 853 Sperling, L., Ortiz, O., and Thiele, G. 2013. *Seed systems. Conceptual frameworks for guiding*  
854 *practical interventions.* ed. CGIAR. CGIAR.
- 855 Stolar, J., and Nielsen, S. E. 2015. Accounting for spatially biased sampling effort in presence-  
856 only species distribution modelling ed. Janet Franklin. *Diversity Distrib.* 21:595–608.
- 857 Sutherst, R. W., and Maywald, G. F. 1985. A computerised system for matching climates in  
858 ecology. *Agriculture, Ecosystems & Environment.* 13:281–299.
- 859 Sutton, N. J., and Armsworth, P. R. 2014. The grain of spatially referenced economic cost and  
860 biodiversity benefit data and the effectiveness of a cost targeting strategy: spatial grain in  
861 conservation planning. *Conservation Biology.* 28:1451–1461.
- 862 Thomas-Sharma, S., Andrade-Piedra, J., Carvajal Yepes, M., Hernandez Nopsa, J. F., Jeger, M.  
863 J., Jones, R. A. C., et al. 2017. A risk assessment framework for seed degeneration:  
864 informing an integrated seed health strategy for vegetatively propagated crops.  
865 *Phytopathology.* 107:1123–1135.
- 866 Tittonell, P., and Giller, K. E. 2013. When yield gaps are poverty traps: The paradigm of  
867 ecological intensification in African smallholder agriculture. *Field Crops Research.*  
868 143:76–90.
- 869 Tulloch, A. I. T., Tulloch, V. J. D., Evans, M. C., and Mills, M. 2014. The value of using  
870 feasibility models in systematic conservation planning to predict landholder management  
871 uptake: management feasibility models. *Conservation Biology.* 28:1462–1473.
- 872 Wang, C., Hawthorne, D., Qin, Y., Pan, X., Li, Z., and Zhu, S. 2017. Impact of climate and host  
873 availability on future distribution of Colorado potato beetle. *Sci Rep.* 7:4489.
- 874 van Wart, J., van Bussel, L. G. J., Wolf, J., Licker, R., Grassini, P., Nelson, A., et al. 2013. Use  
875 of agro-climatic zones to upscale simulated crop yield potential. *Field Crops Research.*  
876 143:44–55.
- 877 van Wart, J., Kersebaum, K. C., Peng, S., Milner, M., and Cassman, K. G. 2013. Estimating crop  
878 yield potential at regional to national scales. *Field Crops Research.* 143:34–43.
- 879 Wiebe, K., Zurek, M., Lord, S., Brzezina, N., Gabrielyan, G., Libertini, J., et al. 2018. Scenario  
880 Development and Foresight Analysis: Exploring Options to Inform Choices. *Annu. Rev.*  
881 *Environ. Resour.* 43:545–570.
- 882 Wilson, E. C. F. 2015. A practical guide to value of information analysis. *PharmacoEconomics.*  
883 33:105–121.
- 884 Xing, Y., Hernandez Nopsa, J. F., Andersen, K. F., Andrade-Piedra, J., Beed, F. D., Blomme, G.,  
885 et al. 2020. Global cropland connectivity: a risk factor for invasion and saturation by  
886 emerging pathogens and pests. *BioScience.* In press.

887 You, L., Crespo, S., Guo, Z., Koo, J., Ojo, W., Sebastian, K., et al. 2012. MapSpaM - Home of  
888 the Spatial Production Allocation Model. Available at: <http://mapspam.info/> [Accessed  
889 December 15, 2017].  
890

891 Table 1. Regional adoption rates after positive seed selection training in Kenya and the expected  
892 benefit of training given the adoption rate (Gildemacher et al. 2011, 2012). The average benefit  
893 is that expected under random allocation of training effort to the regions without regard to  
894 adoption rates.  
895

| County           | Observed adoption rate | Per household benefit \$USD | Expected benefit of training in year 1 |
|------------------|------------------------|-----------------------------|----------------------------------------|
| Nakuru           | 0.46                   | 156                         | 72                                     |
| Nyandarua        | 0.19                   | 156                         | 30                                     |
| Narok            | 0.18                   | 156                         | 28                                     |
| Average Benefit: |                        |                             | 44                                     |

896  
897

898 Table 2. Potential criteria for identifying priority sites for interventions (such as training farmers  
899 to use positive selection for improved seed health).

900

| <b>Criterion</b>                                                 | <b>Rationale</b>                                         |
|------------------------------------------------------------------|----------------------------------------------------------|
| Regions where expected absolute benefit is greatest              | Greatest benefit to regional food production             |
| Regions where expected proportional gain is greatest             | Greatest benefit to regional farmers                     |
| Regions where outcomes before intervention are lowest            | Benefit to regions in greatest need                      |
| Regions where outcomes before intervention are highest           | Benefit to regions currently best adapted for production |
| <i>Incorporating measures of uncertainty at the farm level</i>   |                                                          |
| Regions where the 5 <sup>th</sup> percentile benefit is greatest | Consistent benefit across farmers                        |
| Regions where the trimmed mean is greatest                       | Greatest benefit for typical farmers                     |

901

902

903

| <b>Management performance mapping steps</b>                                                                | <b>Andes case study</b>                                                                                                                     | <b>Kenya case study</b>                                                                                     |
|------------------------------------------------------------------------------------------------------------|---------------------------------------------------------------------------------------------------------------------------------------------|-------------------------------------------------------------------------------------------------------------|
| 1) Formulate questions about the performance of a specific management strategy across a geographic region  | 1) Where does positive selection of farm-saved potato seed provide the greatest benefit in Ecuador and Colombia?                            | 1) Where does positive selection of farm-saved seed provide the greatest benefit in three regions of Kenya? |
| 2) Assemble data related to the performance of the management strategy                                     | 2) Per plant yield, viruses, seed age, altitude, and management (including positive selection)                                              | 2) Positive selection adoption rate and yield response to positive selection                                |
| 3) Identify predictor variables for management performance                                                 | 3) Altitude, variety, and time since seed replacement - identified using Bayesian networks and classification trees                         | 3) Proportional differences in regional adoption rates                                                      |
| 4) Estimate management performance across the geographic study region                                      | 4) Extrapolation based on altitude for major potato regions of Ecuador and Colombia                                                         | 4) (No extrapolation in this case study)                                                                    |
| 5) Evaluate the value of information for management intervention or policy                                 | 5) Comparison of intervention yield benefits with and without acting on information about altitude, variety and time since seed replacement | 5) Comparison of intervention yield benefits with and without acting on information about adoption rates    |
| 6) Evaluate what additional information may be needed before proceeding in participatory planning sessions |                                                                                                                                             |                                                                                                             |
| 7) Design intervention based on geographic locations identified                                            |                                                                                                                                             |                                                                                                             |
| 8) Monitor project outcomes and iteratively adapt strategies based on new data and stakeholder input       |                                                                                                                                             |                                                                                                             |

904

905

906

907

908

909

910

911

912

913

Figure 1. Steps in the management performance mapping pipeline. Selected development interventions should ideally take place in a culture of continuous improvement, based on ongoing monitoring and evaluation with stakeholders, and incorporating experimentation to facilitate adaptive management. Two case studies show how the steps may be implemented. Management performance mapping operates in this context by scaling up field, farm, and plot derived information to larger scale landscapes, regions or countries.

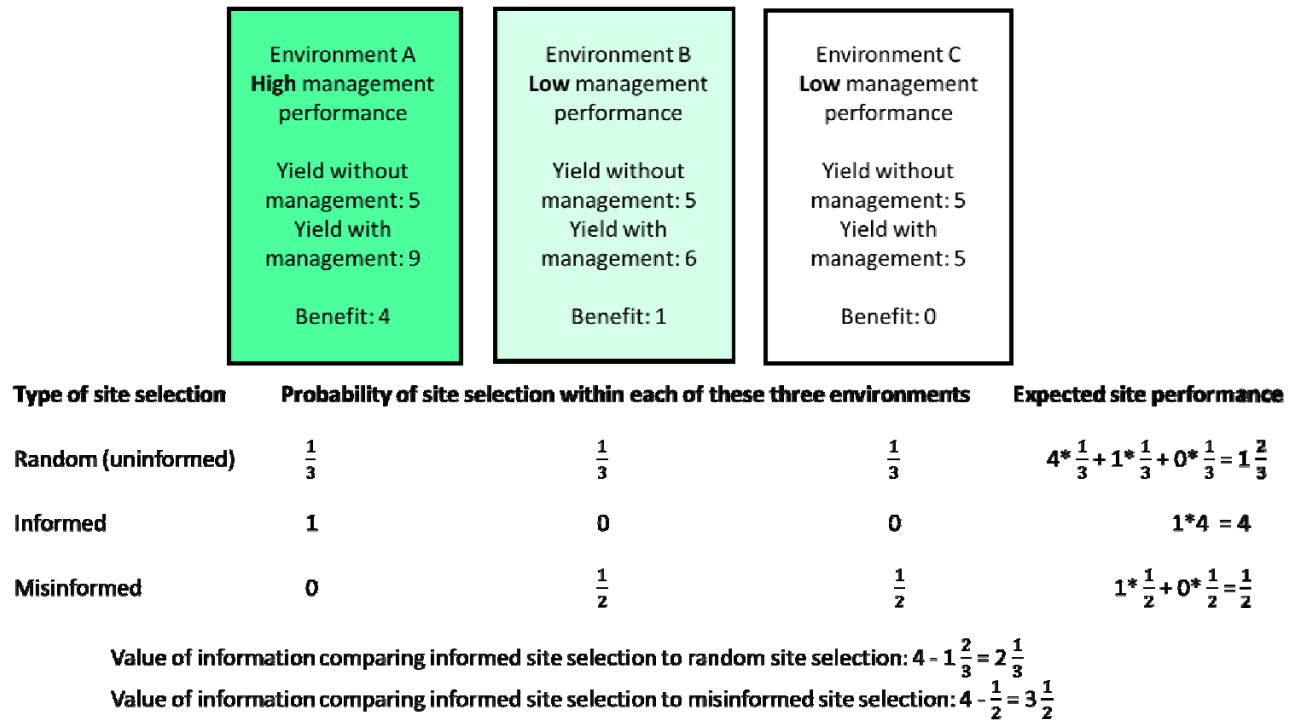

914  
915  
916  
917  
918  
919  
920  
921  
922  
923  
924  
925  
926  
927  
928  
929

Figure 2. The value of information (VOI) for data used to guide site selection for interventions can be evaluated as illustrated here for a hypothetical case. Suppose there are three types of environment, each equally common, and a measure of how well the management being evaluated performs in each environment: improvements in yield in environments A, B, and C of 4, 1, and 0 units, respectively. If sites are selected at random for intervention, without information about yield in the different environments, the average benefit from management is  $1 \frac{2}{3}$  units. If sites are selected considering the information about better management performance in environment A, and thus only environment A is targeted, then the average benefit from management is 4 units. If misinformation leads to the incorrect belief that management is more effective in environments B and C and these environments are equally targeted, then the average benefit from management is  $\frac{1}{2}$  unit. The VOI comparing informed site selection to random site selection is  $2 \frac{1}{3}$  units. The VOI comparing informed site selection to misinformed site selection is  $3 \frac{1}{2}$  units.

930

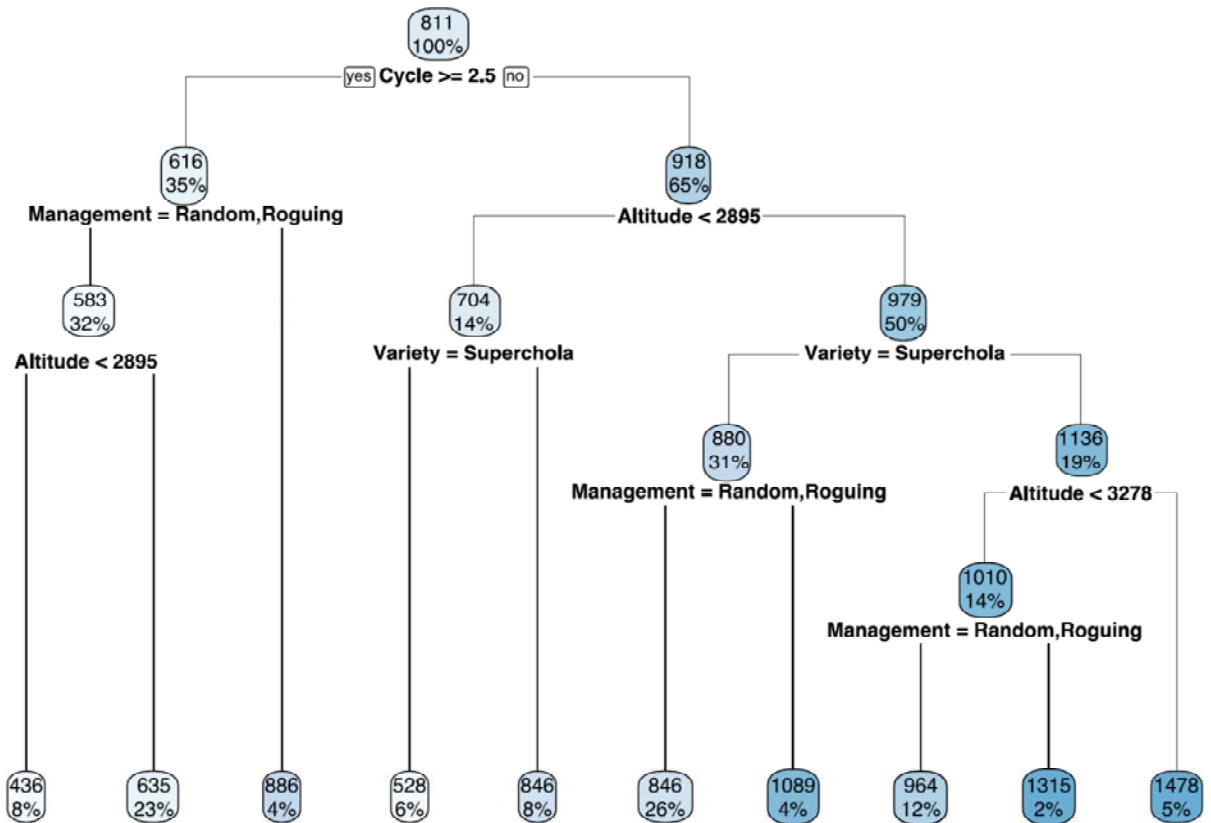

931

932

933

934

935

936

937

938

939

940

941

942

943

944

Figure 3. Recursive partitioning results in a decision tree format, with per plant yield (g) of potato in Ecuador as the response variable, based on the Kromann et al. (2017) dataset. Branches to the left are results when the logical statements at the nodes are true, and branches to the right are results when the logical statements are false. The upper numbers in the boxes are the mean yields for that condition, and the percent values are the proportion of the data for which the condition applies. For “Cycle >= 2.5”, “yes” indicates that the time since seed replacement with certified seed was greater than 2 years, while ‘no’ indicates that it was 2 or fewer years. For “Management = Random, Roguing”, “yes” indicates that either roguing or random seed selection was implemented, while ‘no’ to that option indicates that positive selection was implemented. For “Variety = Superchola”, “no” indicates that the variety was INIAP-Fripapa. (Darker colors indicate a higher number of ‘no’ answers for that condition compared to other conditions.)

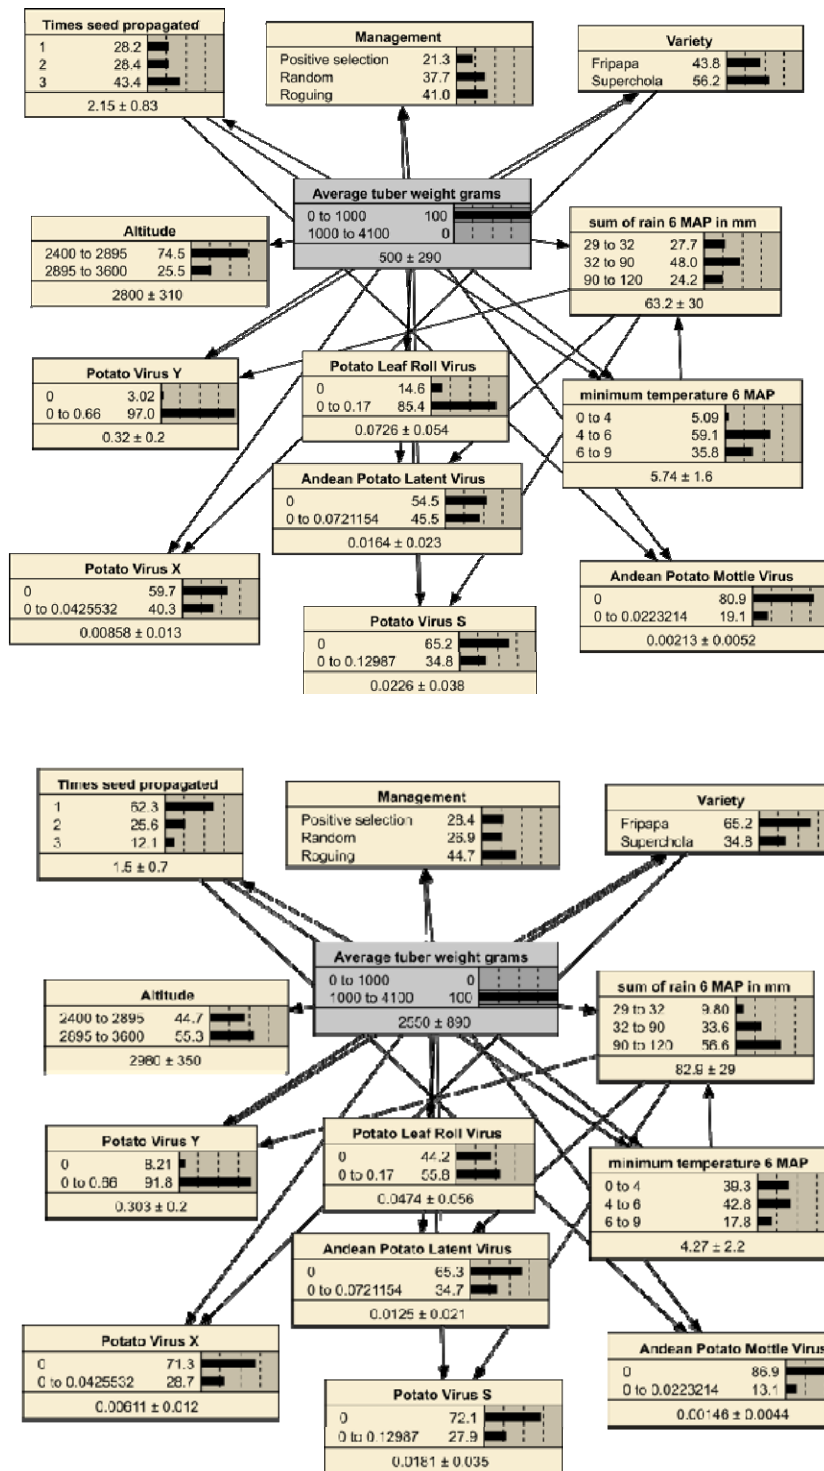

945  
946  
947

948  
949

950 Figure 4. Ecuadorian potato yield and the factors associated with yield from a Bayesian network  
951 analysis carried in Netica using the Kromann et al. (2017) dataset. The two networks indicate the  
952 frequency distribution of a set of twelve potential predictor variables for plants with low yield  
953 (top) and high yield (bottom). The lower text for each node gives the estimated mean and  
954 uncertainty. Positive selection was less likely to be the management implemented for cases  
955 where the yield was low (top network). All the viruses except *Potato virus Y*, and *Potato leaf roll*



956 *virus* for low yield plants, were more likely to be absent (frequency = 0) than present. Each virus  
957 was relatively more likely to be absent if a plant had high yield (bottom) than if it had low yield.  
958  
959

960

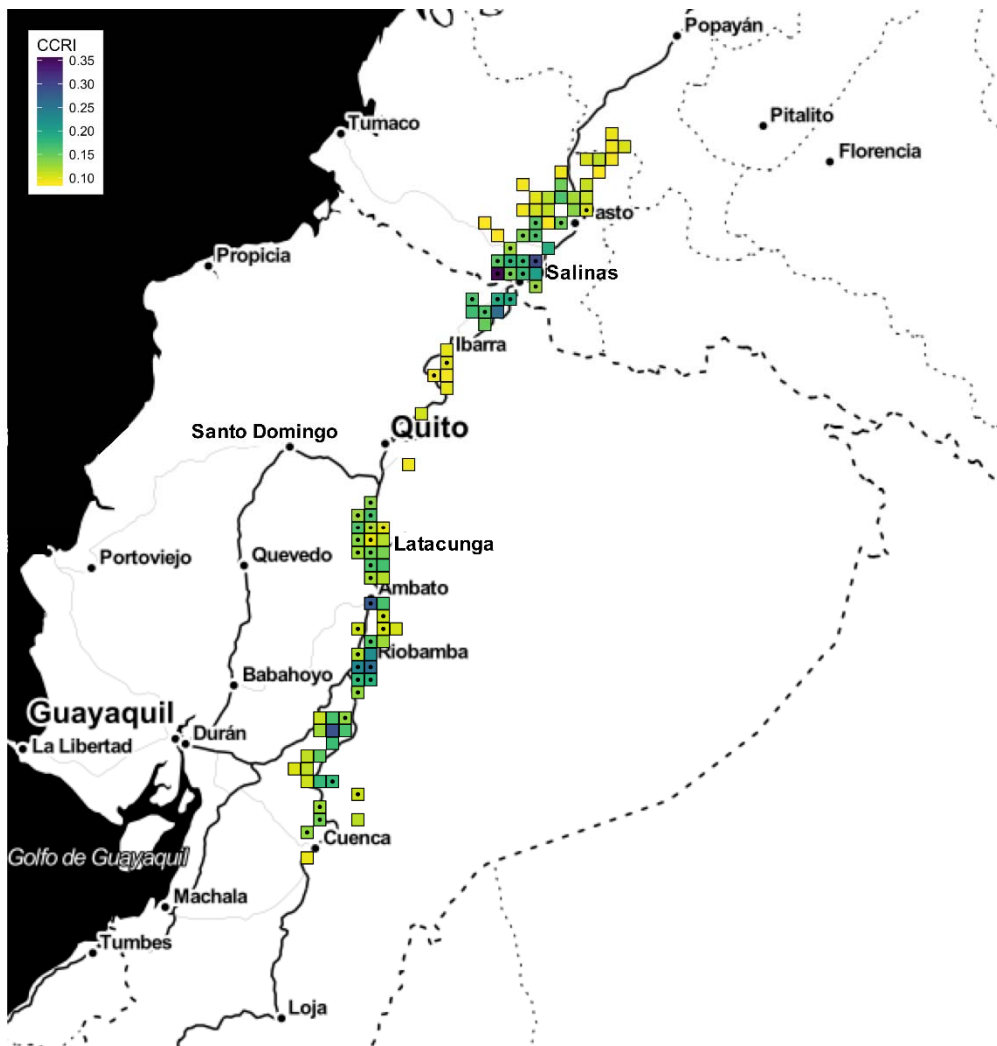

961  
962  
963  
964  
965  
966  
967  
968  
969  
970  
971  
972  
973  
974  
975  
976

Figure 5. Ecuador and southern Colombia, with potato production indicated based on SPAM estimates. An altitude of 2895 m.a.s.l. was identified as a cut-off for management performance for positive selection of plants for on-farm seed saving. Pixels above 2895 m elevation (51% of the pixels) are indicated with a dot, where pixels are included if the harvested area estimate is greater than 200 ha. The graticules are 1-degree squares. Higher values of the potato cropland connectivity risk index estimated for Ecuador and southern Colombia are indicated by darker colors, indicating likely more important roles in potato epidemics. Targeting sites for farmer training in positive selection, might be based on the combination of being above the altitude cut-off for positive selection performance, and being in high cropland connectivity locations such that improved management would have the potential to positively influence other regions.

977  
978

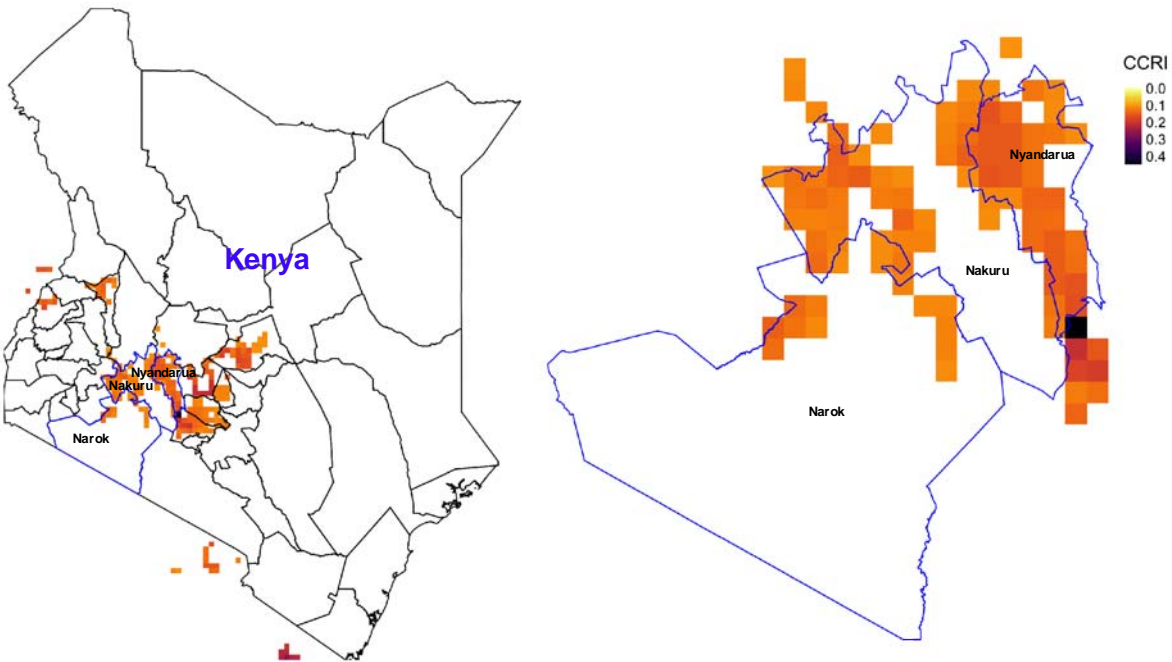

979  
980  
981  
982  
983  
984  
985  
986  
987  
988

Figure 6. Cropland connectivity in the area of three counties in Kenya, where darker shading indicates a higher cropland connectivity risk index. Cropland connectivity is a measure of the likely importance of a pixel for epidemic spread through potato production. When the three counties indicated were studied to evaluate adoption rates for positive selection of plants for on-farm seed saving, Nakuru county was reported to have over twice the adoption rate. Targeting for training in positive selection methods could take into account the higher adoption rate in Nakuru and the higher cropland connectivity in Nyandarua.
